# Supplementary material for: Sedimentary records of mercury stable isotopes in Lake Michigan
Source: Oxford University Press journal article supplement (doi:10.12952/journal.elementa.000086), 2016-01-01
Supplement: elementa_000086_s003.docx [file elementa_000086_s003.docx]

**Table S2** Operating parameters of the Neptune Plus MC-ICP-MS.

| **Plasma parameters** | |
| --- | --- |
| Sample gas | 0.7–0.9L min-1 |
| Additional gas | 0.18–0.25L min-1 |
| Cool gas | 16.0 L min-1 |
| Auxiliary gas | 0.80 L min-1 |
| RF power | 1400 W |
| Heater temperature | 100°C |
| **Apex-Q** |  |
| Chiller temperature | 2°C |
| **Gas phase separator** |  |
| Solution uptake rate | 0.75 mL min-1 |
