# Supplementary material for: Sedimentary records of mercury stable isotopes in Lake Michigan
Source: Oxford University Press journal article supplement (doi:10.12952/journal.elementa.000086), 2016-01-01
Supplement: elementa_000086_s004.docx [file elementa_000086_s004.docx]

**Table S3** Isotopic composition of Hg for UM-Almadén

|  | Hg | δ199Hg | 2σ | δ200Hg | 2σ | δ201Hg | 2σ | δ202Hg | 2σ | Δ199Hg | 2σ | Δ200Hg | 2σ | Δ201Hg | 2σ |
| --- | --- | --- | --- | --- | --- | --- | --- | --- | --- | --- | --- | --- | --- | --- | --- |
|  | concentration | ‰ |  | ‰ |  | ‰ |  | ‰ |  | ‰ |  | ‰ |  | ‰ |  |
| UM-Almadén-1 | 0.3 ng mL-1 | -0.07 |  | -0.18 |  | -0.34 |  | -0.44 |  | 0.04 |  | 0.04 |  | -0.01 |  |
| UM-Almadén-2 | 0.3 ng mL-1 | -0.19 |  | -0.33 |  | -0.46 |  | -0.58 |  | -0.04 |  | -0.04 |  | -0.02 |  |
| UM-Almadén-3 | 0.3 ng mL-1 | -0.19 |  | -0.29 |  | -0.49 |  | -0.54 |  | -0.06 |  | -0.02 |  | -0.09 |  |
|  |  | **-0.15** | **0.14** | **-0.26** | **0.14** | **-0.43** | **0.16** | **-0.52** | **0.14** | **-0.02** | **0.10** | **0.00** | **0.08** | **-0.04** | **0.10** |
| UM-Almadén-4 | 0.5 ng mL-1 | -0.11 |  | -0.21 |  | -0.35 |  | -0.48 |  | 0.01 |  | 0.04 |  | 0.01 |  |
| UM-Almadén-5 | 0.5 ng mL-1 | -0.15 |  | -0.24 |  | -0.42 |  | -0.50 |  | -0.02 |  | 0.02 |  | -0.04 |  |
| UM-Almadén-6 | 0.5 ng mL-1 | -0.15 |  | -0.25 |  | -0.46 |  | -0.54 |  | -0.01 |  | 0.02 |  | -0.05 |  |
|  |  | **-0.13** | **0.04** | **-0.23** | **0.04** | **-0.41** | **0.10** | **-0.51** | **0.06** | **-0.01** | **0.04** | **0.02** | **0.02** | **-0.03** | **0.06** |
| UM-Almadén-7 | 1.0 ng mL-1 | -0.16 |  | -0.28 |  | -0.43 |  | -0.54 |  | -0.02 |  | -0.01 |  | -0.02 |  |
| UM-Almadén-8 | 1.0 ng mL-1 | -0.16 |  | -0.28 |  | -0.46 |  | -0.54 |  | -0.03 |  | -0.01 |  | -0.05 |  |
| UM-Almadén-9 | 1.0 ng mL-1 | -0.13 |  | -0.27 |  | -0.46 |  | -0.52 |  | 0.00 |  | -0.01 |  | -0.07 |  |
|  |  | **-0.15** | **0.04** | **-0.27** | **0.02** | **-0.45** | **0.04** | **-0.53** | **0.02** | **-0.02** | **0.04** | **-0.01** | **0.00** | **-0.05** | **0.04** |
